# Supplementary material for: Study on the sorption and desorption behavior of La3+ and Bi3+ by bis(2-ethylhexyl)phosphate modified activated carbon
Source: Royal Society of Chemistry journal article supplement (doi:10.1039/d4ra06276k), 2024-01-01
Supplement: d4ra06276k1.pdf [file d4ra06276k1.pdf]

# **Study on the sorption and desorption behavior of La<sup>3+</sup> and Bi<sup>3+</sup> by bis(2-ethylhexyl)phosphate modified activated carbon**

**Hongshan Zhu<sup>a,b,c</sup>, Stephan Heinitz<sup>a</sup>, Koen Binnemans<sup>b</sup>, Steven Mullens<sup>c</sup>, Thomas  
Cardinaels<sup>a,b,\*</sup>**

<sup>a</sup> Belgian Nuclear Research Centre (SCK CEN), Institute for Nuclear Materials Science, Boeretang  
200, B-2400 Mol, Belgium

<sup>b</sup> KU Leuven, Department of Chemistry, Celestijnenlaan 200F, P.O. 2404, B-3001 Leuven, Belgium

<sup>c</sup> Flemish Institute for Technological Research (VITO NV), Sustainable Materials Management,  
Boeretang 200, 2400 Mol, Belgium

E-mail of corresponding author: [thomas.cardinaels@sckcen.be](mailto:thomas.cardinaels@sckcen.be)

## **Supporting Information (SI)**

### **Preliminary column test**

Columns with 1-mL empty cartridges (AC-100-R01) were obtained from TrisKem International, and the columns were filled with 0.5 g HDEHP/AC. The initial solution used 3 mL for the column with  $300 \pm 30$  kBq of  $^{225}\text{Ac}$  at  $\text{pH } 5 \pm 1$ . The prepared HDEHP/AC column was rinsed with water before 3 mL of  $^{225}\text{Ac}$  solution was loaded onto the column at a flow rate of  $0.5 \pm 0.03$  mL  $\text{min}^{-1}$ . Subsequently, another HDEHP/AC column was connected to the first column as the guard column during the eluting process. Finally, 5 mL of  $1 \text{ mol L}^{-1}$  NaI/ $0.01 \text{ mol L}^{-1}$   $\text{HNO}_3$  solution was used for eluting  $^{213}\text{Bi}$  at a flow rate of  $0.6 \pm 0.2$  mL  $\text{min}^{-1}$ . The schematic separation process is shown in Fig. 11a.

### **Effect of solid-to-liquid ratio**

The solid-to-liquid ratio was an important factor in choosing an appropriate sorbent mass for the generator column, especially when the density of extractant that immobilized onto materials was low. The results show that the  $K_d$  values and sorption percentages for  $\text{Bi}^{3+}$  onto HDEHP/AC were more than  $10^5$  mL  $\text{g}^{-1}$  and 99.7%, respectively, as calculated by the detection limit threshold. This demonstrates that the HDEHP/AC had a strong affinity for  $\text{Bi}^{3+}$  even at much lower solid-to-liquid ratios (e.g.,  $1 \text{ g L}^{-1}$ ). Fig. S1 shows that the sorption percentages and  $K_d$  values of HDEHP/AC for  $\text{La}^{3+}$  increased rapidly as the solid-to-liquid ratio increased from 0 to  $4 \text{ g L}^{-1}$ . This

was because the high sorbent dose generally offered sufficient active sites for  $\text{La}^{3+}$ , resulting in a lower equilibrium concentration of  $\text{La}^{3+}$  in the solution. The sorption percentages then stabilized because of nearly all of  $\text{La}^{3+}$  adsorbed onto the HDEHP/AC.

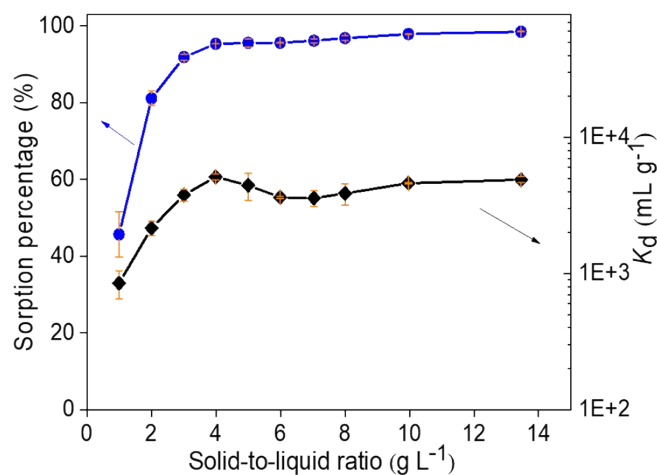

Fig. S1. The effect of solid-to-liquid ratio on the sorption performance of HDEHP/AC for  $\text{La}^{3+}$  and  $\text{Bi}^{3+}$  in the binary system. ( $C_0(\text{La}^{3+}) = 10 \mu\text{mol L}^{-1}$  and  $C_0(\text{Bi}^{3+}) = 10 \mu\text{mol L}^{-1}$ ,  $\text{pH} = 2$ ,  $t = 24 \text{ h}$ ).

Table S1. Elemental composition and specific surface area of HDEHP/AC

| Elemental composition |             |             |         |             | N <sub>2</sub> adsorption                  |
|-----------------------|-------------|-------------|---------|-------------|--------------------------------------------|
| C (wt%)               | H (wt%)     | N (wt%)     | O (wt%) | P (wt%)     | BET area (m <sup>2</sup> g <sup>-1</sup> ) |
| 82.8 ± 0.2            | 3.14 ± 0.01 | 0.19 ± 0.01 | 7 ± 1   | 2.42 ± 0.08 | 528                                        |

Table S2. Kinetic parameters of La<sup>3+</sup>/Bi<sup>3+</sup> sorption onto HDEHP/AC

| Model                         | Parameters                                            | La <sup>3+</sup><br>(Single) | Bi <sup>3+</sup><br>(Single) | La <sup>3+</sup><br>(Binary) | Bi <sup>3+</sup><br>(Binary) |
|-------------------------------|-------------------------------------------------------|------------------------------|------------------------------|------------------------------|------------------------------|
| Pseudo-first-order            | $k_1$ (min <sup>-1</sup> )                            | 0.103                        | 0.308                        | 0.045                        | 0.268                        |
|                               | $q_e$ (μmol g <sup>-1</sup> )                         | 5.175                        | 10.583                       | 3.682                        | 10.313                       |
|                               | $R^2$                                                 | 0.857                        | 0.951                        | 0.943                        | 0.978                        |
| Pseudo-second-order           | $k_2$ (g μmol <sup>-1</sup> min <sup>-1</sup> )       | 0.028                        | 0.038                        | 0.015                        | 0.029                        |
|                               | $q_e$ (μmol g <sup>-1</sup> )                         | 5.590                        | 11.319                       | 4.069                        | 11.228                       |
|                               | $R^2$                                                 | 0.957                        | 0.997                        | 0.977                        | 0.995                        |
| Intraparticle diffusion model | $K_{IPD}$ (μmol g <sup>-1</sup> min <sup>-1/2</sup> ) | 0.245                        | 0.797                        |                              |                              |
|                               | $C$ (μmol g <sup>-1</sup> )                           | 2.692                        | 5.301                        |                              |                              |
|                               | $R^2$                                                 | 0.860                        | 0.797                        |                              |                              |
| Elovich model                 | $\alpha$ (μmol g <sup>-1</sup> min <sup>-1</sup> )    | 5.535                        | 24.354                       |                              |                              |
|                               | $\beta$ (g μmol <sup>-1</sup> )                       | 1.244                        | 0.600                        |                              |                              |
|                               | $R^2$                                                 | 0.970                        | 0.946                        |                              |                              |

Table S3. Langmuir and Freundlich isotherm parameters for La<sup>3+</sup> sorption onto

HDEHP/AC.

| $q_{\max}$ (μmol g <sup>-1</sup> ) | Langmuir                      |       | Freundlich                                                   |       |       |
|------------------------------------|-------------------------------|-------|--------------------------------------------------------------|-------|-------|
|                                    | $K_L$ (L μmol <sup>-1</sup> ) | $R^2$ | $K_F$ (μmol <sup>1-n</sup> ·L <sup>n</sup> g <sup>-1</sup> ) | 1/n   | $R^2$ |
| 15.226                             | 0.242                         | 0.984 | 3.545                                                        | 0.469 | 0.970 |
